# Supplementary material for: PTEN modulates neurites outgrowth and neuron apoptosis involving the PI3K/Akt/mTOR signaling pathway
Source: PubMed Central journal article supplement — Mol Med Rep. 2019 Sep 10;20(5):4059–66. doi: 10.3892/mmr.2019.10670 (PMC6797942; doi:10.3892/mmr.2019.10670), 2019-09-10

Figure S1. Inhibitory efficiency of bpV(pic) on PTEN. Western blot (7 days post-culture) showing the decreased expression of the PTEN following various treatments. Molecular weights (kDa) of the bands are shown on the left. Quantification of the gray-value was shown on the right (One-way analysis of variance,  $P < 0.001$ ). bpV(pic), dipotassium bisperoxo (picolinate) oxovanadate; LY, LY294002; Rida, ridaforolimus ( $^{***}P < 0.0001$  vs. control).

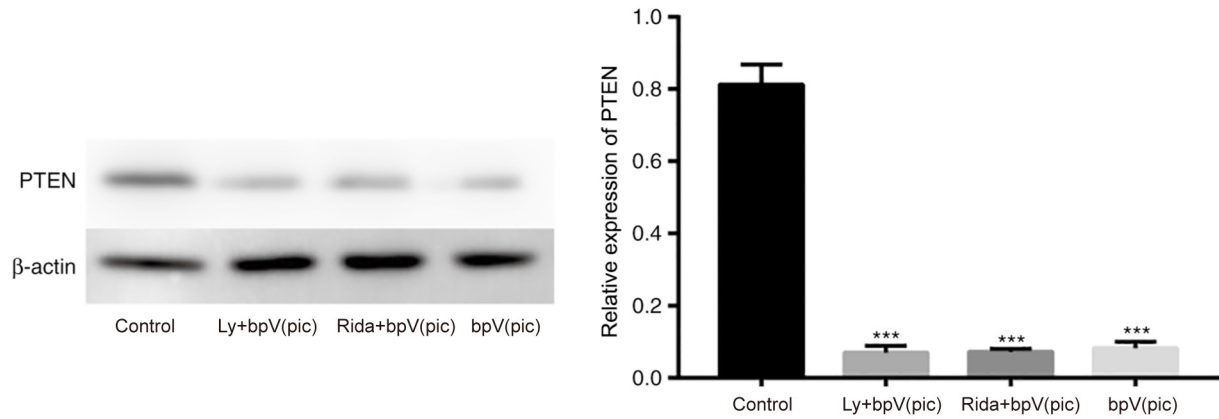

Supplement: Supplementary_Data.pdf [file Supplementary_Data.pdf]
